# Supplementary material
Source: publisher figshare collection journal article supplement (https://adisjournals.figshare.com/articles/dataset/_/12759614)
Supplement: Supplementary file 1 [file 2]

# Glycemic Control Following GLP-1 RA or Basal Insulin Initiation in Real-World Practice: A Retrospective, Observational, Longitudinal Cohort Study

OPEN ACCESS

PEER-REVIEWED INFOGRAPHIC

Xuejun Victor Peng • Rory J. McCrimmon • Leah Shepherd • Anders Boss • Robert Lubwama  
Terry Dex • Neil Skolnik • Linong Ji • Angelo Avogaro • Lawrence Blonde

## WHY CARRY OUT THIS STUDY?

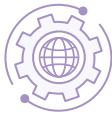

There is a need for real-world evidence of effectiveness of these injectable agents to complement the randomized controlled trial evidence

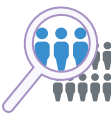

This study was conducted to investigate the effectiveness of initiating therapy with either GLP-1 RA or BI in real-world clinical practice

## STUDY DETAILS

### STUDY DESIGN

Retrospective, observational, longitudinal cohort study of real-world data

### PATIENTS

People with T2D inadequately controlled on OADs

### DATABASES USED

- US Optum Humedica®
- UK Clinical Practice Research Datalink

### INCLUSION CRITERIA

- **≥18 years of age** at index date (date of first prescription of either injectable)
- **Diagnosis of T2D** or unspecified diabetes
- Initiated GLP-1 RA or BI **Jan 1, 2010 – Jun 30, 2016**
- **≥180 days before to 720 days after** recorded medical history from index date

- **≥1 OAD** during the 180-day baseline period
- **≥7% most recent HbA1c** within 90 days before and 14 days after the index date
- **≥1 valid HbA1c record** within 15 and 720 days after GLP-1 RA or BI initiation

### EXCLUSION CRITERIA

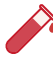

Diagnosis of type 1 diabetes at any time

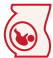

Gestational diabetes within 180 days before the index date

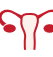

Polycystic ovary syndrome at any time before the index date

## WHAT WAS LEARNED FROM THE STUDY?

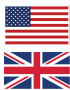

In clinical practice in both countries, injectable therapies are generally reserved for those with relatively advanced disease

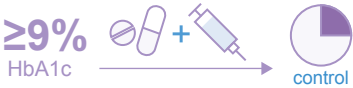

Only about 25% of people achieve control with a single injectable medication added to oral therapy once HbA1c is ≥9%

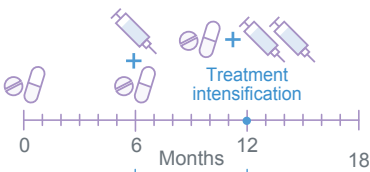

Treatment intensification should be considered if HbA1c is not well controlled after 6–12 months on either injectable

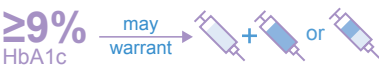

Regimens with greater antihyperglycemic efficacy including combination injectable therapy may be warranted for those people with HbA1c ≥9%

### Proportion of all patients achieving HbA1c <7% by baseline HbA1c categories

— ≥7–<8% — ≥8–<9% — ≥9%

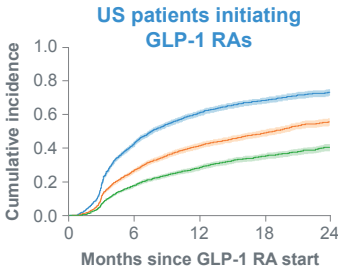

| At risk | ≥7–<8% | ≥8–<9% | ≥9%  |
|---------|--------|--------|------|
| 0       | 6844   | 3126   | 911  |
| 6       | 6411   | 3544   | 1283 |
| 12      | 5781   | 4488   | 1783 |
| 18      | 5011   | 4729   | 1011 |
| 24      | 274    | 439    | 617  |

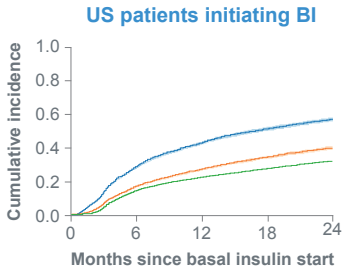

| At risk | ≥7–<8% | ≥8–<9% | ≥9%  |
|---------|--------|--------|------|
| 0       | 14,323 | 6378   | 3837 |
| 6       | 14,025 | 8115   | 5624 |
| 12      | 13,840 | 6242   | 4228 |
| 18      | 10,489 | 4228   | 3231 |
| 24      | 1984   | 4228   | 3231 |

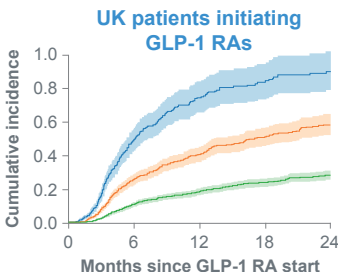

| At risk | ≥7–<8% | ≥8–<9% | ≥9%  |
|---------|--------|--------|------|
| 0       | 709    | 305    | 179  |
| 6       | 1480   | 815    | 507  |
| 12      | 3394   | 2209   | 1487 |
| 18      | 1028   | 247    | 763  |
| 24      | 85     | 247    | 763  |

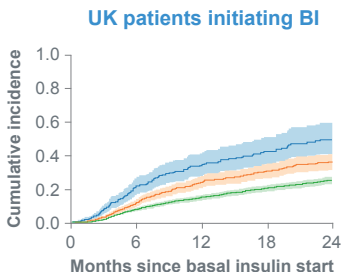

| At risk | ≥7–<8% | ≥8–<9% | ≥9%  |
|---------|--------|--------|------|
| 0       | 478    | 275    | 185  |
| 6       | 1114   | 785    | 563  |
| 12      | 4014   | 3001   | 2347 |
| 18      | 151    | 460    | 1940 |
| 24      | 124    | 389    | 1647 |
